# Supplementary material for: Lysis-independent potentiation of immune checkpoint blockade by oncolytic virus
Source: PubMed Central journal article supplement (PMC6033351; doi:10.18632/oncotarget.25614), 2018-06-19
Supplement: oncotarget-09-28702-s001.pdf [file oncotarget-09-28702-s001.pdf]

## Lysis-independent potentiation of immune checkpoint blockade by oncolytic virus

### SUPPLEMENTARY MATERIALS

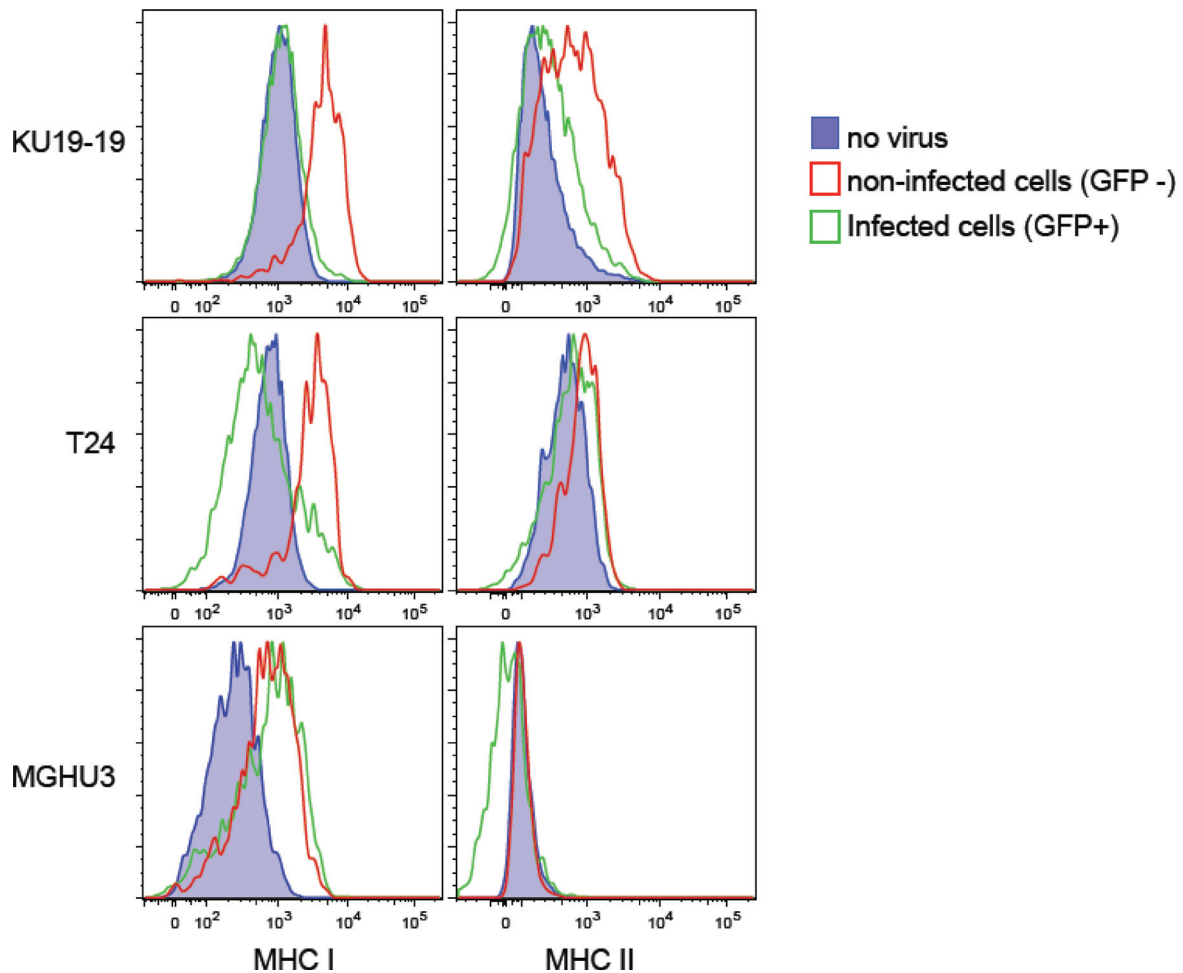

**Supplementary Figure 1: NDV infection upregulates MHC I and MHC II in the infected and non-infected cells.** Indicated cell lines were treated with NDV expressing GFP (NDV-GFP) at MOI of 2 and 24 hours were collected by scraping, stained with antibodies to HLA-ABC (MHC-I) and HLA-DR (MHC-II), and analyzed by flow cytometry. Representative histograms represent gating on the NDV-infected (GFP+), non-infected (GFP-), and control cells that received no virus.

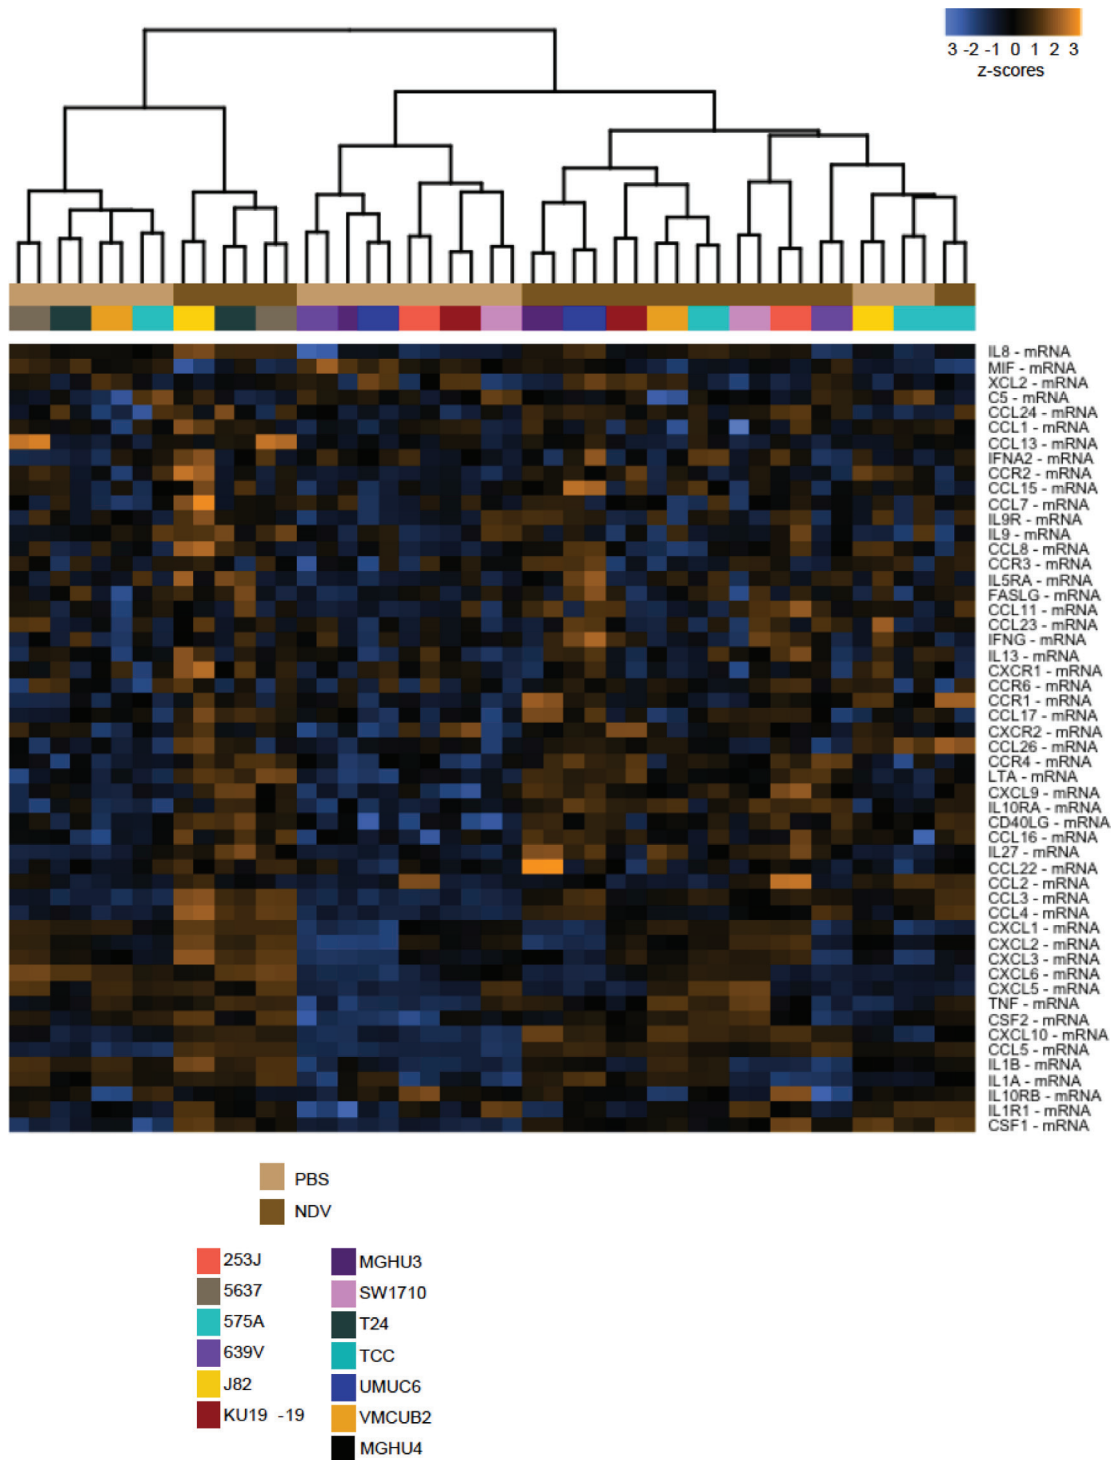

**Supplementary Figure 2: NDV induces upregulation of chemokines and cytokines in human bladder cancer cell lines.** Gene expression analysis was performed using the Innate Immunity Panel profiling kit on the Nanostring platform. Upregulation of gene sets related to chemokine and cytokine response is shown. Data represent a single experiment with 2 replicates per cell line.
